# Supplementary material
Source: PubMed Central journal article supplement (PMC3403829)
Supplement: NIHMS257560-supplement-1_si_001.pdf [file NIHMS257560-supplement-1_si_001.pdf]

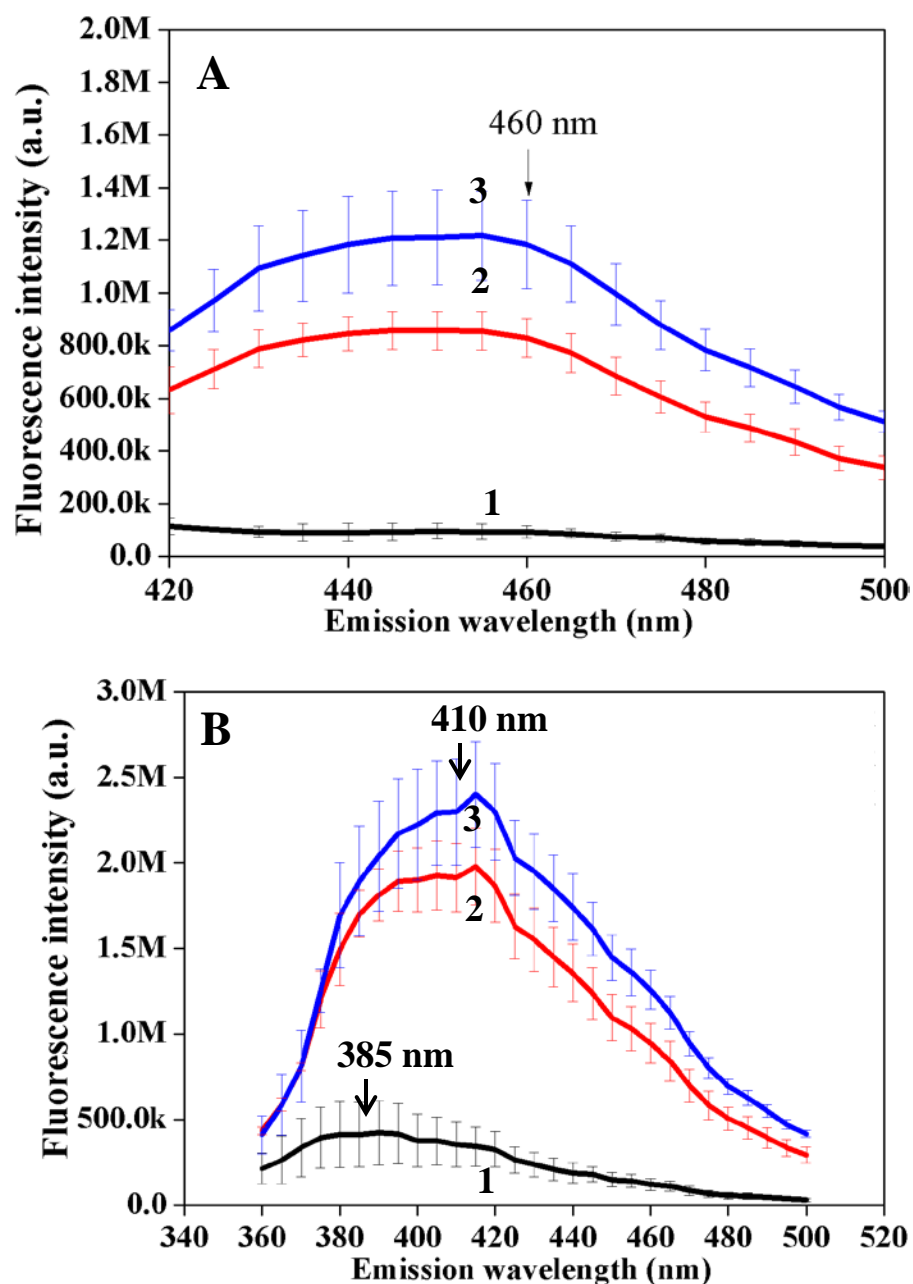

**Figure S1.** The effect of glycation with 0.1 M ribose on the production of advanced glycation endproducts. (A) Fluorescence emission spectra ( $\lambda_{\text{ex}} = 360$  nm) of the samples that were incubated with ribose for 0 hr (1), 3 weeks (2), 6 weeks (3). (B) Fluorescence emission spectra ( $\lambda_{\text{ex}} = 330$  nm) of the samples that were incubated with ribose for 0 hr (1), 3 weeks (2), 6 weeks (3).

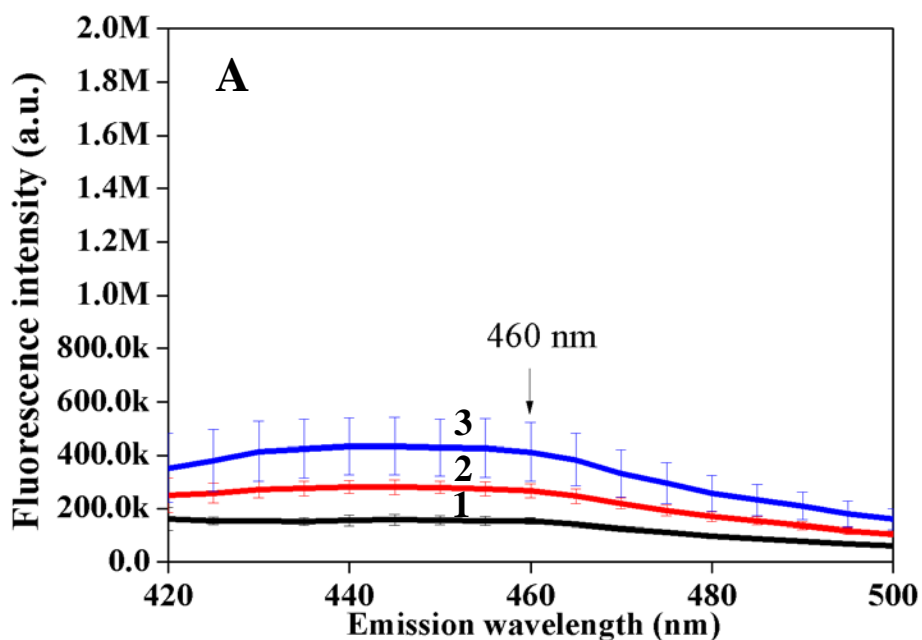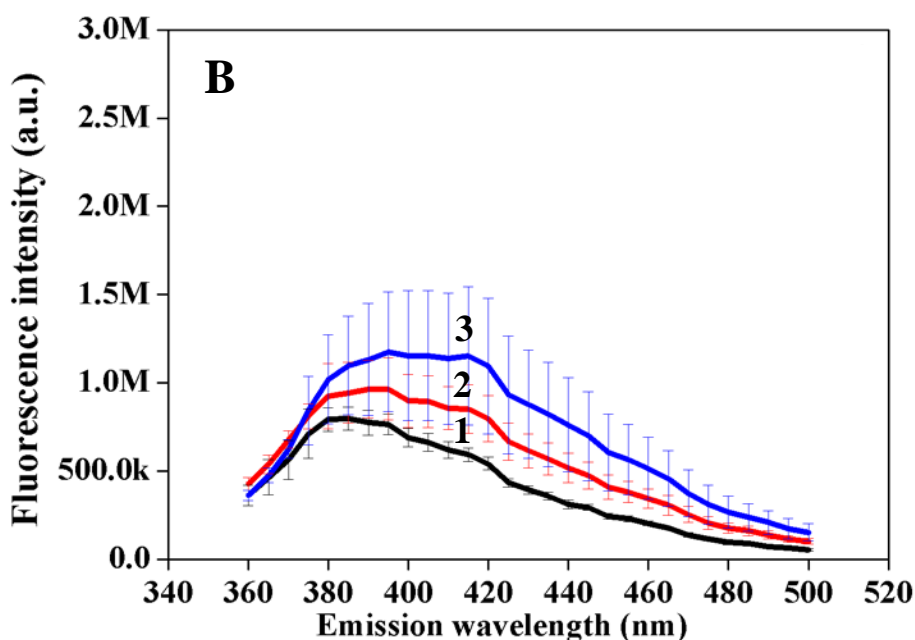

**Figure S2.** The effect of glycation with 0.1 M glucose on the production of advanced glycation endproducts. (A) Fluorescence emission spectra ( $\lambda_{\text{ex}} = 360 \text{ nm}$ ) of the samples that were incubated with glucose for 0 hr (1), 3 weeks (2), 6 weeks (3). (B) Fluorescence emission spectra ( $\lambda_{\text{ex}} = 330 \text{ nm}$ ) of the samples that were incubated with glucose for 0 hr (1), 3 weeks (2), 6 weeks (3).

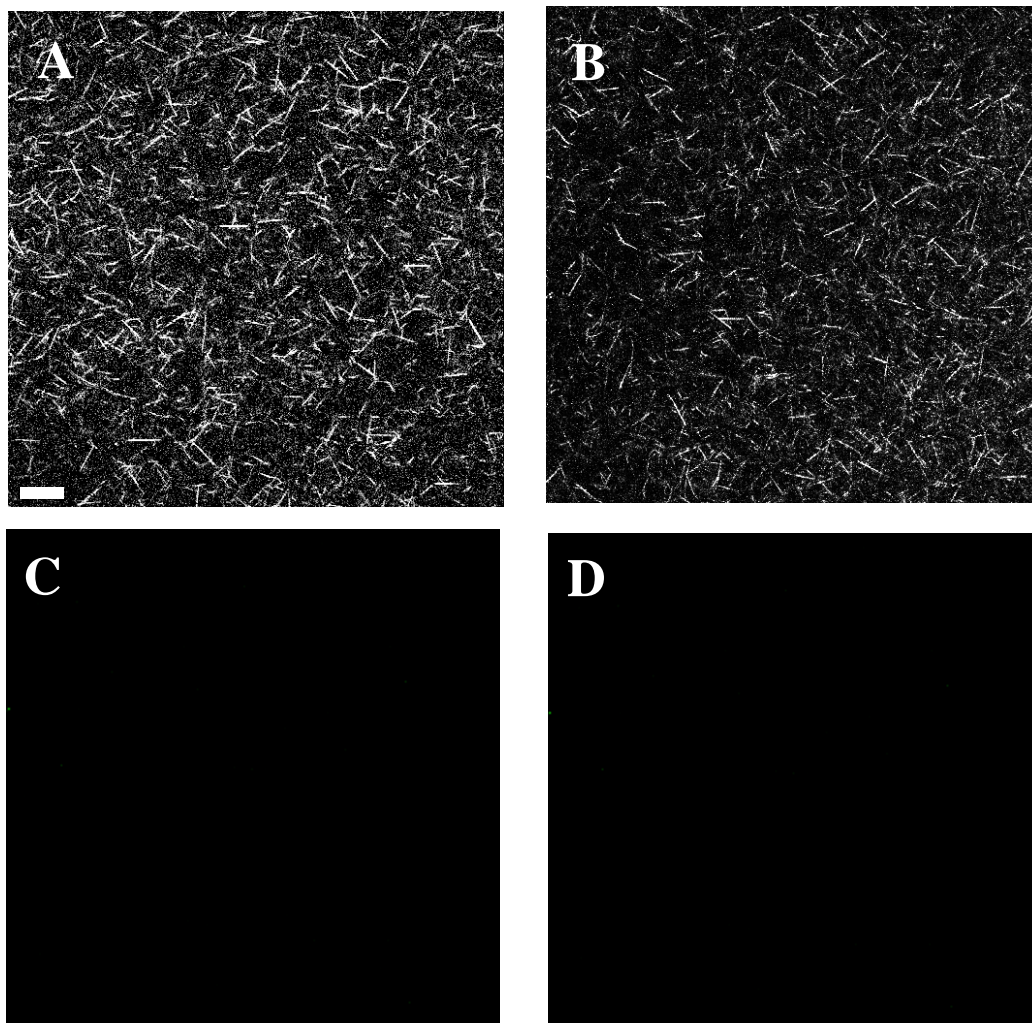

**Supporting Information Figure S3.** Typical second harmonic generation (SHG) and two photon fluorescence (TPF) images of the 2 g/l collagen hydrogels incubated with 0.1M glycerol. (A) SHG and (C) TPF; The 2 g/l collagen gels that have not been exposed to glycerol are shown for comparison (B) SHG and (D) TPF ; These images were taken in X-Y plane. The scale is 20  $\mu\text{m}$ .

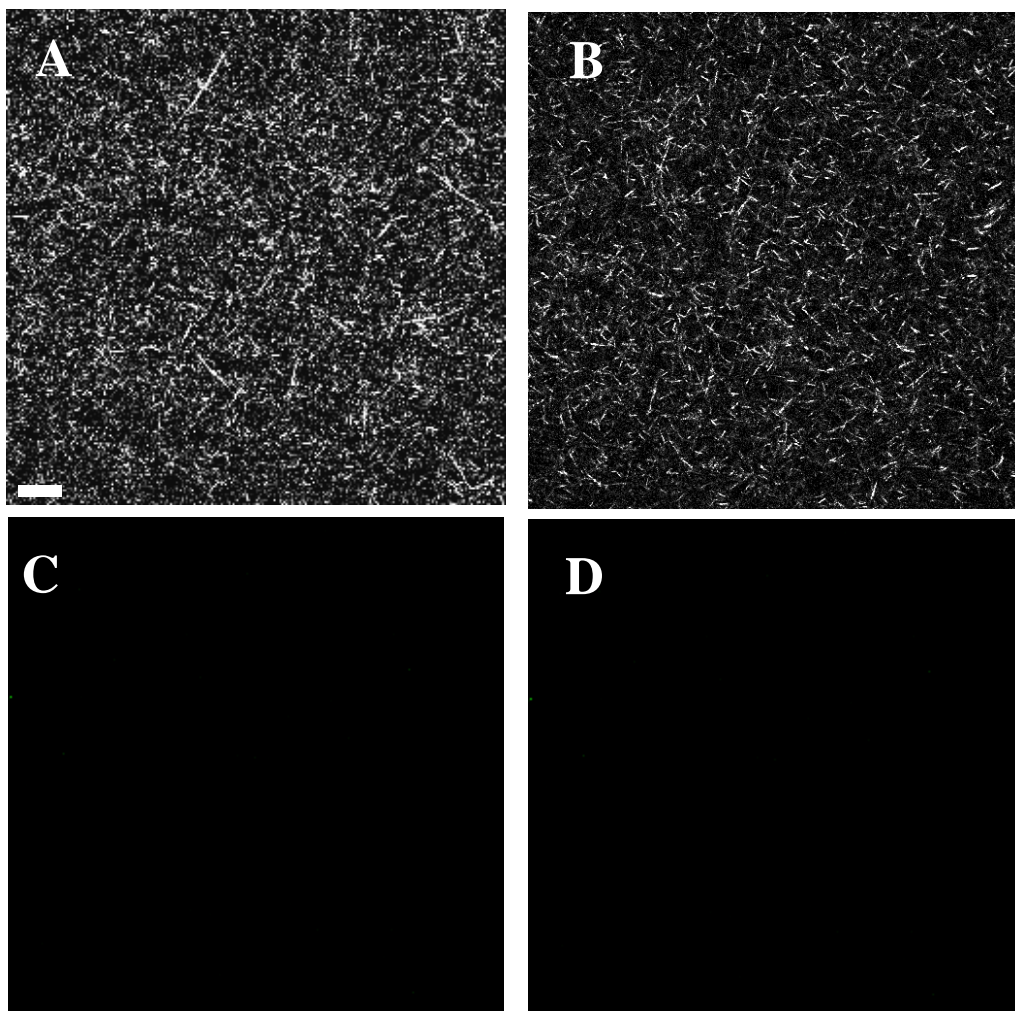

**Supporting Information Figure S4.** Typical second harmonic generation (SHG) and two photon fluorescence (TPF) images of the 3 g/l collagen hydrogels incubated with 0.1M xylitol. (A) SHG and (C) TPF; 3 g/l collagen gels that have not been exposed to xylitol are shown for comparison (B) SHG and (D) TPF ; These images were taken in X-Y plane. The scale is 20  $\mu\text{m}$ .

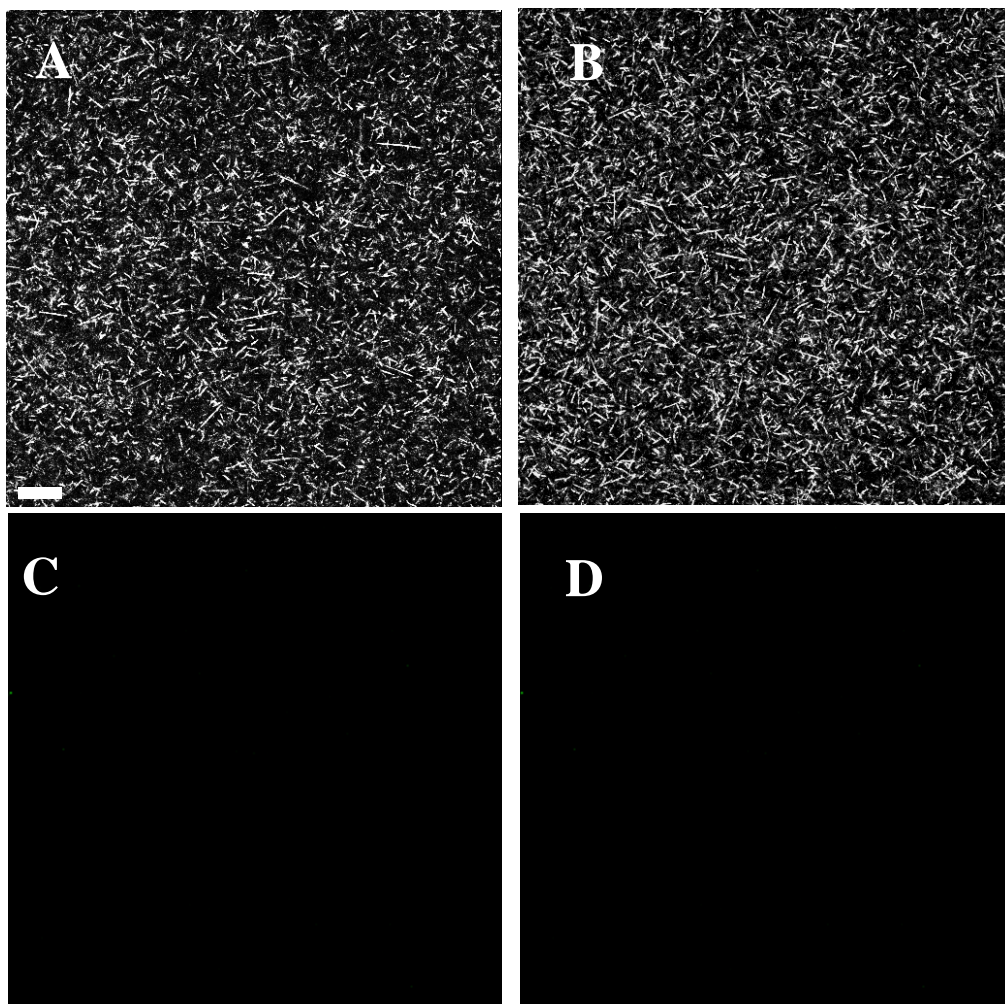

**Supporting Info Figure S5.** Typical second harmonic generation (SHG) and two photon fluorescence (TPF) images of the 4.68 g/l collagen hydrogels incubated with 0.1M sorbitol. (A) SHG and (C) TPF; The 4.68 g/l collagen gels that have not been exposed to sorbitol are shown for comparison (B) SHG and (D) TPF ; These images were taken in X-Y plane. The scale is 20  $\mu\text{m}$ .

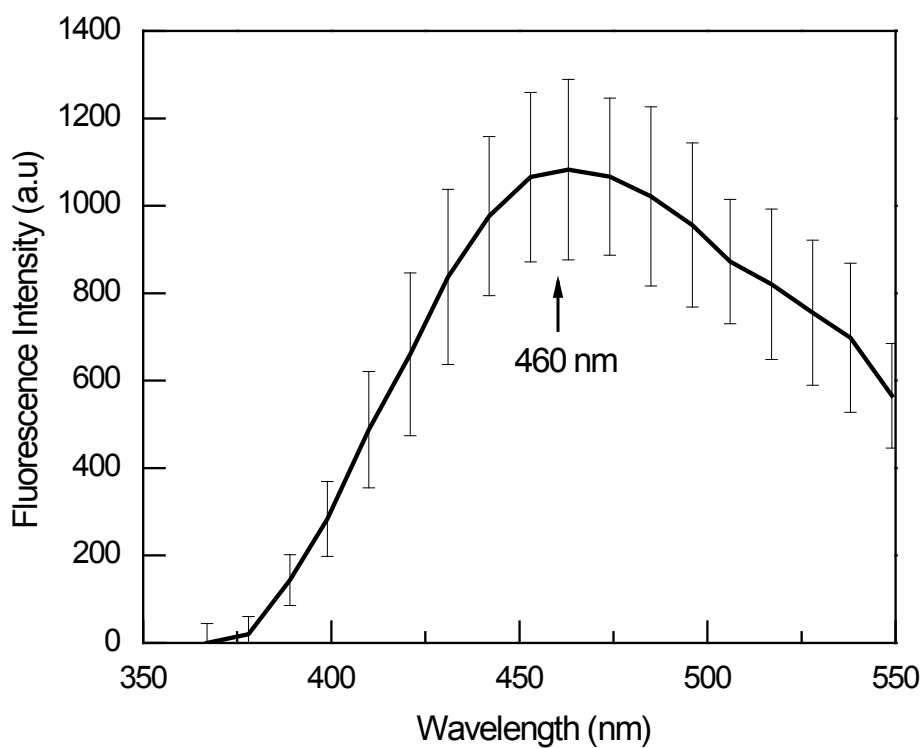

**Supporting Information Figure S6.** Two photon fluorescence emission spectra ( $\lambda_{\text{ex}} = 720 \text{ nm}$ ) of the collagen hydrogel that was incubated with 0.1M ribose for 6 weeks.

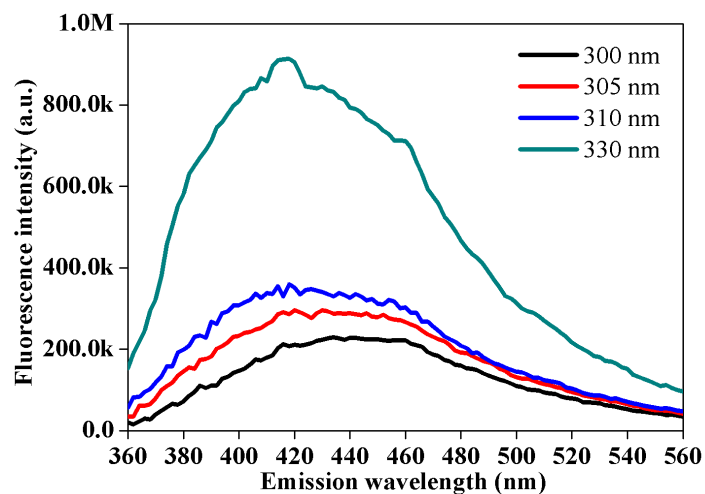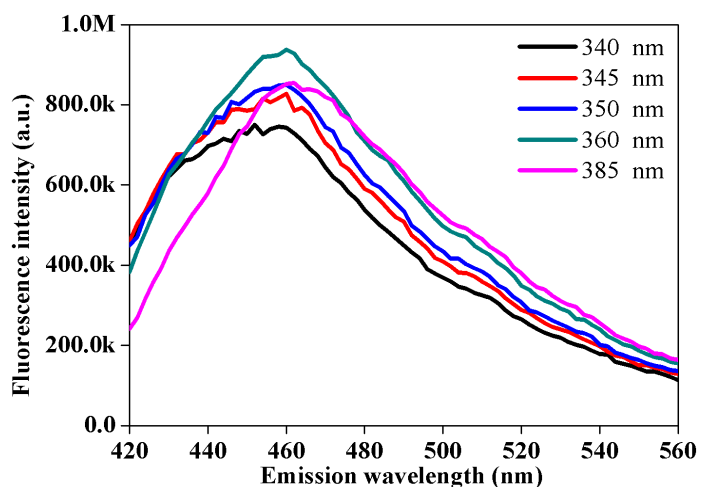

**Supporting Information Figure S7.** The effect of changing the excitation wavelength on fluorescence of advanced glycation endproducts formed with 0.1 M glyceraldehyde (24-hr product).

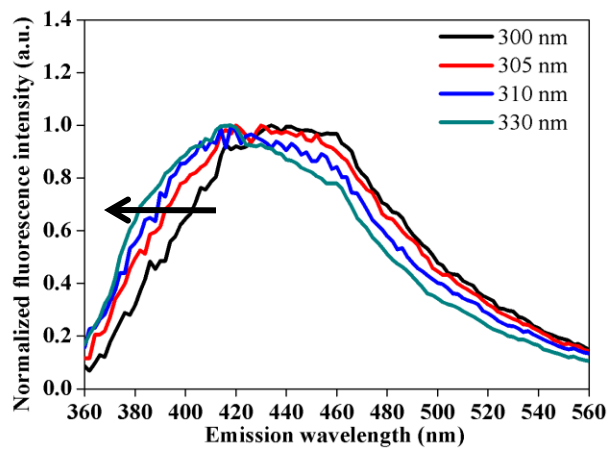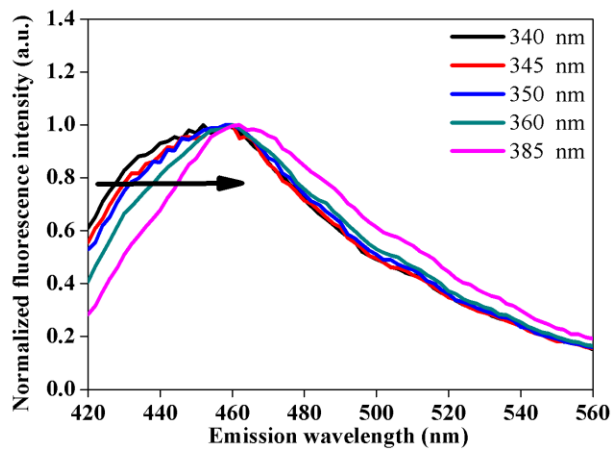

**Supporting Information Figure S8.** The effect of changing the excitation wavelength on fluorescence of advanced glycation endproducts formed with 0.1 M glyceraldehydes (24-hr product). The data is the same as in Supporting Information Figure 7, however, normalized.
